# Supplementary material for: Particulate inorganic carbon quotas by coccolithophores in low oxygen/low pH waters off the Southeast Pacific margin
Source: Copernicus journal article supplement (doi:10.5194/egusphere-2024-3463), 2024-12-04
Supplement: Supplementary file 1 [file egusphere-2024-3463-supplement.pdf]

## Supplementary Section S1. Tables

**Table S1. Coccospheres and detached coccolith standing stocks and associated PIC measurements in waters off the Southeast Pacific margin during the late-spring 2015 (LowPHOX 1 cruise). 'na' indicates not available data.**

| Station | Date       | Longitude<br>(° W) | Latitude<br>(° S) | Depth<br>(m) | Spheres<br>(per L <sup>-1</sup> ) | Liths<br>(per L <sup>-1</sup> ) | PIC<br>(mmol L <sup>-1</sup> ) | PIC:POC |
|---------|------------|--------------------|-------------------|--------------|-----------------------------------|---------------------------------|--------------------------------|---------|
| T1_07   | 2015-11-27 | -70.20983          | -20.09859         | 2            | 154959                            | 1276277                         | 2.09                           | 0.010   |
| T1_05   | 2015-11-27 | -70.20983          | -20.09859         | 10           | 63397                             | 1182411                         | 1.30                           | 0.008   |
| T1_03   | 2015-11-27 | -70.20983          | -20.09859         | 50           | 6302                              | 280312                          | 1.34                           | 0.013   |
| T1_01   | 2015-11-27 | -70.20983          | -20.09859         | 100          | 2135                              | 255866                          | 1.22                           | 0.017   |
| T2_20   | 2015-11-27 | -70.24963          | -20.10028         | 2            | 387235                            | 5400814                         | 2.19                           | 0.009   |
| T2_18   | 2015-11-27 | -70.24963          | -20.10028         | 10           | 127385                            | 1292712                         | 3.81                           | 0.022   |
| T2_16   | 2015-11-27 | -70.24963          | -20.10028         | 50           | 3883                              | 301066                          | 1.22                           | 0.019   |
| T2_14   | 2015-11-27 | -70.24963          | -20.10028         | 100          | 1448                              | 120766                          | 0.93                           | 0.022   |
| T2_12   | 2015-11-27 | -70.24963          | -20.10028         | 200          | 3981                              | 768823                          | 0.64                           | 0.010   |
| T2_10   | 2015-11-27 | -70.24963          | -20.10028         | 300          | 4524                              | 614038                          | 0.84                           | 0.016   |
| T2_08   | 2015-11-27 | -70.24963          | -20.10028         | 400          | 1164                              | 162972                          | 0.49                           | 0.015   |
| T3_41   | 2015-11-27 | -70.42027          | -20.10010         | 2            | 12060                             | 50847                           | 0.20                           | 0.002   |
| T3_39   | 2015-11-27 | -70.42027          | -20.10010         | 10           | 14559                             | 95339                           | na                             | na      |
| T3_37   | 2015-11-27 | -70.42027          | -20.10010         | 50           | 543                               | 61929                           | 0.41                           | 0.009   |
| T3_34   | 2015-11-27 | -70.42027          | -20.10010         | 100          | 4980                              | 148033                          | 0.62                           | 0.020   |
| T3_32   | 2015-11-27 | -70.42027          | -20.10010         | 200          | 1992                              | 388417                          | 0.91                           | 0.020   |
| T3_30   | 2015-11-27 | -70.42027          | -20.10010         | 300          | 2623                              | 586021                          | 0.88                           | 0.023   |
| T3_28   | 2015-11-27 | -70.42027          | -20.10010         | 400          | 2082                              | 410147                          | 0.78                           | 0.023   |
| T3_26   | 2015-11-27 | -70.42027          | -20.10010         | 500          | 1405                              | 161614                          | 0.76                           | 0.020   |
| T3_22   | 2015-11-27 | -70.42027          | -20.10010         | 750          | 453                               | 138526                          | 0.58                           | na      |
| T3_21   | 2015-11-27 | -70.42027          | -20.10010         | 1000         | 562                               | 224766                          | 0.65                           | na      |
| T4_63   | 2015-11-28 | -70.59990          | -20.09992         | 2            | 1086                              | 47262                           | na                             | na      |
| T4_61   | 2015-11-28 | -70.59990          | -20.09992         | 10           | 4496                              | 49707                           | 1.34                           | 0.010   |
| T4_59   | 2015-11-28 | -70.59990          | -20.09992         | 50           | 11843                             | 134452                          | 0.45                           | 0.008   |
| T4_57   | 2015-11-28 | -70.59990          | -20.09992         | 100          | na                                | na                              | 0.18                           | 0.004   |
| T4_53   | 2015-11-28 | -70.59990          | -20.09992         | 200          | 4104                              | 607072                          | 0.78                           | 0.012   |
| T4_51   | 2015-11-28 | -70.59990          | -20.09992         | 300          | 2278                              | 248533                          | 0.37                           | 0.011   |
| T4_49   | 2015-11-28 | -70.59990          | -20.09992         | 400          | 2897                              | 334999                          | 0.31                           | 0.007   |
| T4_47   | 2015-11-28 | -70.59990          | -20.09992         | 500          | 1750                              | 96878                           | 0.67                           | 0.017   |

|        |            |           |           |      |        |         |      |       |
|--------|------------|-----------|-----------|------|--------|---------|------|-------|
| T4_43  | 2015-11-28 | -70.59990 | -20.09992 | 750  | 1026   | 252154  | 0.44 | 0.019 |
| T4_42  | 2015-11-28 | -70.59990 | -20.09992 | 1000 | 60     | 77140   | 0.40 | 0.015 |
| T5_77  | 2015-11-28 | -70.89187 | -20.09927 | 100  | 4618   | 578552  | 0.62 | 0.015 |
| T5_75  | 2015-11-28 | -70.89187 | -20.09927 | 200  | 2023   | 151157  | 0.63 | 0.016 |
| T5_73  | 2015-11-28 | -70.89187 | -20.09927 | 300  | 8638   | 660853  | 0.62 | 0.015 |
| T5_71  | 2015-11-28 | -70.89187 | -20.09927 | 400  | 1956   | 319018  | 0.51 | 0.013 |
| T5_69  | 2015-11-28 | -70.89187 | -20.09927 | 500  | 4400   | 554106  | 0.44 | 0.014 |
| T6_98  | 2015-11-28 | -71.14552 | -20.09932 | 100  | 5867   | 397245  | 0.35 | 0.008 |
| T6_96  | 2015-11-28 | -71.14552 | -20.09932 | 200  | 10430  | 640074  | 0.59 | 0.013 |
| T6_94  | 2015-11-28 | -71.14552 | -20.09932 | 300  | 3934   | 714633  | 0.45 | 0.011 |
| T6_91  | 2015-11-28 | -71.14552 | -20.09932 | 500  | 2248   | 435543  | 0.37 | 0.012 |
| L1_160 | 2015-12-05 | -70.49990 | -21.49958 | 5    | 30984  | 3210542 | 1.31 | 0.030 |
| L1_159 | 2015-12-05 | -70.49990 | -21.49958 | 25   | 89463  | 5622314 | 2.18 | 0.009 |
| L1_158 | 2015-12-05 | -70.49990 | -21.49958 | 50   | 9747   | 664783  | 0.58 | 0.012 |
| L1_157 | 2015-12-05 | -70.49990 | -21.49958 | 100  | 1416   | 500906  | 0.62 | 0.015 |
| L1_156 | 2015-12-05 | -70.49990 | -21.49958 | 200  | 1046   | 625360  | 1.03 | 0.019 |
| L1_155 | 2015-12-05 | -70.49990 | -21.49958 | 300  | 4863   | 1496535 | 1.10 | 0.030 |
| L1_154 | 2015-12-05 | -70.49990 | -21.49958 | 380  | 1908   | 951568  | 0.51 | 0.002 |
| L2_167 | 2015-12-06 | -70.77552 | -22.99972 | 5    | 83513  | 4524648 | 1.98 | 0.011 |
| L2_166 | 2015-12-06 | -70.77552 | -22.99972 | 25   | 91597  | 2476704 | 1.33 | 0.014 |
| L2_165 | 2015-12-06 | -70.77552 | -22.99972 | 50   | 21853  | 1419750 | 1.19 | 0.015 |
| L2_164 | 2015-12-06 | -70.77552 | -22.99972 | 100  | 1600   | 238858  | 0.38 | 0.007 |
| L2_163 | 2015-12-06 | -70.77552 | -22.99972 | 200  | 4247   | 345533  | 0.43 | 0.014 |
| L2_162 | 2015-12-06 | -70.77552 | -22.99972 | 300  | 8926   | 1307149 | 0.83 | 0.014 |
| L2_161 | 2015-12-06 | -70.77552 | -22.99972 | 350  | 4986   | 1536731 | 0.68 | 0.016 |
| L3_174 | 2015-12-07 | -70.76965 | -24.50902 | 5    | 141335 | 6287612 | 2.46 | 0.022 |
| L3_173 | 2015-12-07 | -70.76965 | -24.50902 | 25   | 24623  | 734354  | 1.22 | 0.009 |
| L3_172 | 2015-12-07 | -70.76965 | -24.50902 | 50   | 7284   | 520489  | 0.38 | 0.007 |
| L3_171 | 2015-12-07 | -70.76965 | -24.50902 | 100  | 2278   | 613765  | 0.47 | 0.009 |
| L3_170 | 2015-12-07 | -70.76965 | -24.50902 | 200  | 4801   | 1107714 | 0.98 | 0.028 |
| L3_169 | 2015-12-07 | -70.76965 | -24.50902 | 300  | 1662   | 703433  | 0.66 | 0.014 |
| L3_168 | 2015-12-07 | -70.76965 | -24.50902 | 350  | 1600   | 348625  | 0.21 | 0.008 |
| L4_181 | 2015-12-07 | -70.85445 | -26.01713 | 5    | 5130   | 363312  | 0.31 | 0.002 |
| L4_180 | 2015-12-07 | -70.85445 | -26.01713 | 25   | 5171   | 272097  | 0.36 | 0.002 |
| L4_179 | 2015-12-07 | -70.85445 | -26.01713 | 50   | 4104   | 295030  | 2.44 | 0.042 |

|        |            |           |           |     |       |         |      |       |
|--------|------------|-----------|-----------|-----|-------|---------|------|-------|
| L4_178 | 2015-12-07 | -70.85445 | -26.01713 | 100 | 2031  | 569704  | 2.72 | 0.048 |
| L4_177 | 2015-12-07 | -70.85445 | -26.01713 | 200 | 3263  | 949249  | 0.95 | 0.020 |
| L4_176 | 2015-12-07 | -70.85445 | -26.01713 | 300 | 1477  | 1263861 | 1.23 | 0.054 |
| L4_175 | 2015-12-07 | -70.85445 | -26.01713 | 350 | 2339  | 1947196 | 0.54 | 0.014 |
| L5_188 | 2015-12-08 | -71.13293 | -27.50957 | 5   | 37057 | 1408413 | 0.88 | 0.006 |
| L5_187 | 2015-12-08 | -71.13293 | -27.50957 | 25  | 19452 | 1188880 | 0.99 | 0.012 |
| L5_186 | 2015-12-08 | -71.13293 | -27.50957 | 50  | 7633  | 514820  | 0.58 | 0.009 |
| L5_185 | 2015-12-08 | -71.13293 | -27.50957 | 100 | 1046  | 331619  | 0.42 | 0.005 |
| L5_184 | 2015-12-08 | -71.13293 | -27.50957 | 200 | 1170  | 319251  | 0.38 | 0.015 |
| L5_183 | 2015-12-08 | -71.13293 | -27.50957 | 300 | 1539  | 955433  | 1.15 | 0.041 |
| L5_182 | 2015-12-08 | -71.13293 | -27.50957 | 350 | 369   | 1240671 | 0.97 | 0.018 |
| L6_200 | 2015-12-09 | -71.62032 | -29.51215 | 5   | 33549 | 877359  | 1.19 | 0.011 |
| L6_199 | 2015-12-09 | -71.62032 | -29.51215 | 10  | 18672 | 1597541 | 0.81 | 0.007 |
| L6_197 | 2015-12-09 | -71.62032 | -29.51215 | 50  | 3693  | 98944   | 0.45 | 0.010 |
| L6_196 | 2015-12-09 | -71.62032 | -29.51215 | 100 | 2401  | 500133  | 0.47 | 0.012 |
| L6_194 | 2015-12-09 | -71.62032 | -29.51215 | 200 | 1231  | 548060  | 0.64 | 0.018 |
| L6_192 | 2015-12-09 | -71.62032 | -29.51215 | 300 | 1108  | 405827  | 0.41 | 0.010 |
| L6_191 | 2015-12-09 | -71.62032 | -29.51215 | 400 | 554   | 225717  | 0.68 | 0.028 |
| L6_190 | 2015-12-09 | -71.62032 | -29.51215 | 500 | 1231  | 401962  | 0.77 | na    |

5 **Table S2. Coccospheres and detached coccolith standing stocks and associated PIC measurements in waters off the Southeast Pacific margin during the mid-summer 2018 (LowpHOX 2 cruise). ‘na’ indicates not available data.**

| Station     | Date       | Longitude (° W) | Latitude (° S) | Depth (m) | Spheres (per L <sup>-1</sup> ) | Liths (per L <sup>-1</sup> ) | PIC (mmol L <sup>-1</sup> ) | PIC:POC |
|-------------|------------|-----------------|----------------|-----------|--------------------------------|------------------------------|-----------------------------|---------|
| Lander2_001 | 2018-01-29 | -71.31996       | -23.38402      | 2         | 36565                          | 2252533                      | 1.13                        | na      |
| Lander2_002 | 2018-01-29 | -71.31996       | -23.38402      | 10        | 53796                          | 2487055                      | 1.06                        | na      |
| Lander2_003 | 2018-01-29 | -71.31996       | -23.38402      | 25        | 73356                          | 4554280                      | 1.49                        | na      |
| Lander2_004 | 2018-01-29 | -71.31996       | -23.38402      | 50        | 18303                          | 890500                       | 0.46                        | na      |
| Lander2_005 | 2018-01-29 | -71.31996       | -23.38402      | 100       | 3940                           | 678182                       | 0.37                        | na      |
| Lander2_006 | 2018-01-29 | -71.31996       | -23.38402      | 250       | na                             | na                           | 0.35                        | na      |
| Lander2_007 | 2018-01-29 | -71.31996       | -23.38402      | 500       | na                             | na                           | 0.28                        | na      |
| Lander2_008 | 2018-01-29 | -71.31996       | -23.38402      | 750       | na                             | na                           | 0.48                        | na      |
| Lander2_009 | 2018-01-29 | -71.31996       | -23.38402      | 1000      | na                             | na                           | 0.47                        | na      |
| Lander2_010 | 2018-01-29 | -71.31996       | -23.38402      | 2000      | na                             | na                           | 0.38                        | na      |
| Lander2_011 | 2018-01-29 | -71.31996       | -23.38402      | 3000      | na                             | na                           | 0.45                        | na      |
| Lander2_012 | 2018-01-29 | -71.31996       | -23.38402      | 4000      | na                             | na                           | 0.17                        | na      |

|             |            |           |           |      |        |         |      |       |
|-------------|------------|-----------|-----------|------|--------|---------|------|-------|
| Lander2_013 | 2018-01-29 | -71.31996 | -23.38402 | 5000 | na     | na      | 0.11 | na    |
| T05_001     | 2018-02-03 | -70.89187 | -20.09927 | 2    | 4925   | 30920   | 0.08 | 0.002 |
| T05_002     | 2018-02-03 | -70.89187 | -20.09927 | 10   | 1231   | 15460   | 0.08 | 0.001 |
| T05_003     | 2018-02-03 | -70.89187 | -20.09927 | 25   | 303354 | 4900844 | 3.05 | 0.009 |
| T05_004     | 2018-02-03 | -70.89187 | -20.09927 | 30   | 516835 | 3503253 | 2.23 | 0.014 |
| T05_005     | 2018-02-03 | -70.89187 | -20.09927 | 50   | 1231   | 143779  | 0.17 | 0.002 |
| T05_006     | 2018-02-03 | -70.89187 | -20.09927 | 100  | 2783   | 1162589 | 0.36 | 0.007 |
| T05_007     | 2018-02-03 | -70.89187 | -20.09927 | 250  | 2937   | 750720  | 0.47 | 0.011 |
| T05_008     | 2018-02-03 | -70.89187 | -20.09927 | 500  | 2046   | 400893  | 0.18 | 0.006 |
| T05_009     | 2018-02-03 | -70.89187 | -20.09927 | 750  | na     | na      | 0.30 | 0.010 |
| T05_010     | 2018-02-03 | -70.89187 | -20.09927 | 1000 | na     | na      | 0.20 | 0.007 |
| T05_011     | 2018-02-03 | -70.89187 | -20.09927 | 2000 | 616    | 219533  | 0.25 | 0.008 |
| T05_012     | 2018-02-03 | -70.89187 | -20.09927 | 2800 | na     | na      | 0.18 | 0.007 |
| T03_019     | 2018-02-05 | -70.42027 | -20.10010 | 2    | 30779  | 1546007 | 3.44 | 0.008 |
| T03_020     | 2018-02-05 | -70.42027 | -20.10010 | 10   | 42064  | 2016251 | 5.32 | 0.011 |
| T03_021     | 2018-02-05 | -70.42027 | -20.10010 | 25   | 45963  | 783310  | 1.76 | 0.008 |
| T03_022     | 2018-02-05 | -70.42027 | -20.10010 | 50   | 410    | 126257  | 0.23 | 0.005 |
| T03_023     | 2018-02-05 | -70.42027 | -20.10010 | 100  | 1133   | 552484  | 0.53 | 0.016 |
| T03_024     | 2018-02-05 | -70.42027 | -20.10010 | 250  | na     | na      | 0.39 | 0.011 |
| T03_025     | 2018-02-05 | -70.42027 | -20.10010 | 500  | na     | na      | 0.18 | 0.005 |
| T03_026     | 2018-02-05 | -70.42027 | -20.10010 | 750  | na     | na      | 0.23 | 0.007 |
| T03_027     | 2018-02-05 | -70.42027 | -20.10010 | 1000 | na     | na      | 0.28 | 0.011 |
| T01_034     | 2018-02-06 | -70.20983 | -20.09859 | 2    | 16005  | 783310  | 2.30 | 0.006 |
| T01_035     | 2018-02-06 | -70.20983 | -20.09859 | 10   | 6521   | 376676  | 1.83 | 0.006 |
| T01_036     | 2018-02-06 | -70.20983 | -20.09859 | 25   | 1253   | 359948  | 0.75 | 0.006 |
| T01_037     | 2018-02-06 | -70.20983 | -20.09859 | 50   | 1094   | 434600  | 0.57 | 0.006 |
| T01_038     | 2018-02-06 | -70.20983 | -20.09859 | 100  | 528    | 318036  | 0.60 | 0.005 |
| Hyd002_001  | 2018-02-07 | -71.33462 | -21.33567 | 2    | 118255 | 3722623 | 1.67 | na    |
| Hyd2_Tes_5  | 2018-02-07 | -71.33462 | -21.33567 | 5    | 75839  | 4545262 | 0.00 | na    |
| Hyd2_Tes_10 | 2018-02-07 | -71.33462 | -21.33567 | 10   | 102276 | 3140140 | 1.59 | na    |
| Hyd2_Tes_30 | 2018-02-07 | -71.33462 | -21.33567 | 30   | 164973 | 3975448 | 2.02 | na    |
| Hyd002_010  | 2018-02-07 | -71.33462 | -21.33567 | 50   | 6156   | 239631  | 0.72 | na    |
| Hyd002_015  | 2018-02-07 | -71.33462 | -21.33567 | 100  | 2257   | 340122  | 0.34 | na    |
| Hyd3_001    | 2018-02-08 | -71.47207 | -25.00338 | 2    | 31086  | 977850  | 1.37 | na    |
| Hyd3_002    | 2018-02-08 | -71.47207 | -25.00338 | 10   | 36934  | 1047420 | 1.70 | na    |

|             |            |           |           |      |        |         |      |    |
|-------------|------------|-----------|-----------|------|--------|---------|------|----|
| Hyd3_004    | 2018-02-08 | -71.47207 | -25.00338 | 25   | 216189 | 3596013 | 2.87 | na |
| Hyd3_010    | 2018-02-08 | -71.47207 | -25.00338 | 50   | 19874  | 706746  | 0.75 | na |
| Hyd3_015    | 2018-02-08 | -71.47207 | -25.00338 | 100  | 4573   | 1106500 | 0.71 | na |
| Hyd3_016    | 2018-02-08 | -71.47207 | -25.00338 | 250  | na     | na      | 0.60 | na |
| Hyd3_017    | 2018-02-08 | -71.47207 | -25.00338 | 500  | na     | na      | 0.00 | na |
| Hyd3_018    | 2018-02-08 | -71.47207 | -25.00338 | 750  | na     | na      | 0.49 | na |
| Hyd3_019    | 2018-02-08 | -71.47207 | -25.00338 | 1000 | na     | na      | 0.45 | na |
| Hyd4_074    | 2018-02-08 | -71.57857 | -26.48587 | 2    | 3693   | 81165   | 0.21 | na |
| Hyd4_073    | 2018-02-08 | -71.57857 | -26.48587 | 10   | 3693   | 123681  | 0.39 | na |
| Hyd4_070    | 2018-02-08 | -71.57857 | -26.48587 | 25   | 9110   | 374134  | 0.93 | na |
| Hyd4_065    | 2018-02-08 | -71.57857 | -26.48587 | 50   | 179009 | 2059282 | 1.93 | na |
| Hyd4_060    | 2018-02-08 | -71.57857 | -26.48587 | 100  | 2052   | 167484  | 0.64 | na |
| Hyd4_059    | 2018-02-08 | -71.57857 | -26.48587 | 250  | na     | na      | 0.53 | na |
| Hyd4_058    | 2018-02-08 | -71.57857 | -26.48587 | 500  | na     | na      | 0.68 | na |
| Hyd4_057    | 2018-02-08 | -71.57857 | -26.48587 | 750  | na     | na      | 0.50 | na |
| Hyd4_056    | 2018-02-08 | -71.57857 | -26.48587 | 1000 | na     | na      | 0.47 | na |
| Lander1_097 | 2018-02-09 | -72.08040 | -28.25007 | 5    | 85359  | 3983546 | 2.67 | na |
| Lander1_095 | 2018-02-09 | -72.08040 | -28.25007 | 15   | 97260  | 3262076 | 2.27 | na |
| Lander1_093 | 2018-02-09 | -72.08040 | -28.25007 | 25   | 87411  | 2947721 | 2.22 | na |
| Lander1_089 | 2018-02-09 | -72.08040 | -28.25007 | 45   | 73048  | 2081957 | 1.83 | na |
| Lander1_083 | 2018-02-09 | -72.08040 | -28.25007 | 100  | 6771   | 251226  | 0.51 | na |
| Lander1_082 | 2018-02-09 | -72.08040 | -28.25007 | 250  | na     | na      | 0.53 | na |
| Lander1_081 | 2018-02-09 | -72.08040 | -28.25007 | 500  | na     | na      | 0.78 | na |
| Lander1_080 | 2018-02-09 | -72.08040 | -28.25007 | 750  | na     | na      | 0.59 | na |
| Lander1_079 | 2018-02-09 | -72.08040 | -28.25007 | 1000 | na     | na      | 0.69 | na |
| Hyd6_130    | 2018-02-12 | -72.69940 | -32.50307 | 5    | 128860 | 3329069 | 2.76 | na |
| Hyd6_129    | 2018-02-12 | -72.69940 | -32.50307 | 10   | 135118 | 2670728 | 5.86 | na |
| Hyd6_126    | 2018-02-12 | -72.69940 | -32.50307 | 25   | 56633  | 1430057 | 2.11 | na |
| Hyd6_121    | 2018-02-12 | -72.69940 | -32.50307 | 50   | 42167  | 896684  | 0.90 | na |
| Hyd6_116    | 2018-02-12 | -72.69940 | -32.50307 | 100  | 7695   | 796194  | 1.09 | na |
| Hyd6_115    | 2018-02-12 | -72.69940 | -32.50307 | 250  | na     | na      | 1.26 | na |
| Hyd6_114    | 2018-02-12 | -72.69940 | -32.50307 | 500  | na     | na      | 0.94 | na |
| Hyd6_113    | 2018-02-12 | -72.69940 | -32.50307 | 750  | na     | na      | 0.90 | na |
| Hyd6_112    | 2018-02-12 | -72.69940 | -32.50307 | 1000 | na     | na      | 0.85 | na |
| Hyd7_152    | 2018-02-13 | -73.12212 | -33.95928 | 5    | 7797   | 185521  | 2.09 | na |

|          |            |           |           |      |       |         |      |    |
|----------|------------|-----------|-----------|------|-------|---------|------|----|
| Hyd7_151 | 2018-02-13 | -73.12212 | -33.95928 | 10   | 8823  | 185521  | 3.18 | na |
| Hyd7_148 | 2018-02-13 | -73.12212 | -33.95928 | 25   | 14422 | 214232  | 1.59 | na |
| Hyd7_143 | 2018-02-13 | -73.12212 | -33.95928 | 50   | 41243 | 1370793 | 1.47 | na |
| Hyd7_138 | 2018-02-13 | -73.12212 | -33.95928 | 100  | 3693  | 1287603 | 1.12 | na |
| Hyd7_137 | 2018-02-13 | -73.12212 | -33.95928 | 250  | na    | na      | 1.58 | na |
| Hyd7_136 | 2018-02-13 | -73.12212 | -33.95928 | 500  | na    | na      | 0.69 | na |
| Hyd7_135 | 2018-02-13 | -73.12212 | -33.95928 | 750  | na    | na      | 0.86 | na |
| Hyd7_134 | 2018-02-13 | -73.12212 | -33.95928 | 1000 | na    | na      | 0.80 | na |

**Table S3. Coccolith length measurements used to estimate specific PIC<sub>Cocco</sub> quotas.**

| Species or genus                | Length (µm) | Volume (µm <sup>3</sup> ) | Mass (pg) | Coccoliths measured |
|---------------------------------|-------------|---------------------------|-----------|---------------------|
| <i>Gephyrocapsa parvula</i>     | 2.0 ± 0.1   | 0.4                       | 1.0       | 6                   |
| <i>Gephyrocapsa huxleyi</i>     | 3.6 ± 0.3   | 0.9                       | 2.5       | 20                  |
| <i>Gephyrocapsa oceanica</i>    | 5.2 ± 0.6   | 6.9                       | 18.7      | 20                  |
| <i>Helicosphaera</i> spp.       | 9.0 ± 1.1   | 36.9                      | 99.7      | 20                  |
| <i>Oolithotus</i> spp.          | 4.5 ± 0.4   | 6.2                       | 16.8      | 20                  |
| <i>C. leptoporus</i> large-type | 8.1 ± 0.9   | 41.9                      | 113.0     | 20                  |
| <i>C. leptoporus</i> small-type | 3.9 ± 0.4   | 4.7                       | 12.6      | 11                  |
| <i>Syracosphaera</i> spp.       | 3.7 ± 0.2   | 0.8                       | 2.0       | 2                   |
| <i>Acanthoica</i> spp.          | 4.0 ± 0.3   | 1.9                       | 5.2       | 5                   |
| <i>Discosphaera tubifera</i>    | 1.6 ± 0.1   | 0.3                       | 0.8       | 2                   |
| <i>Umbellosphaera</i> spp.      | 5.7 ± 0.6   | 2.7                       | 7.4       | 7                   |
| <i>Umbilicosphaera</i> spp.     | 4.7 ± 0.6   | 5.1                       | 13.9      | 7                   |

10 Supplementary Section S2. Figures

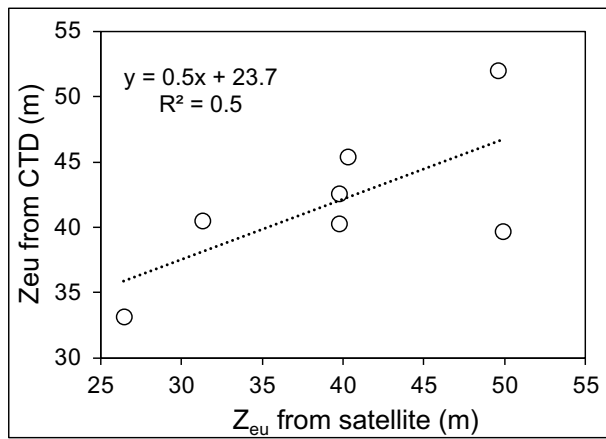

**Figure S1.** Comparison between euphotic depth derived from satellite observations and from PAR obtained with a sensor attached to the CTD.

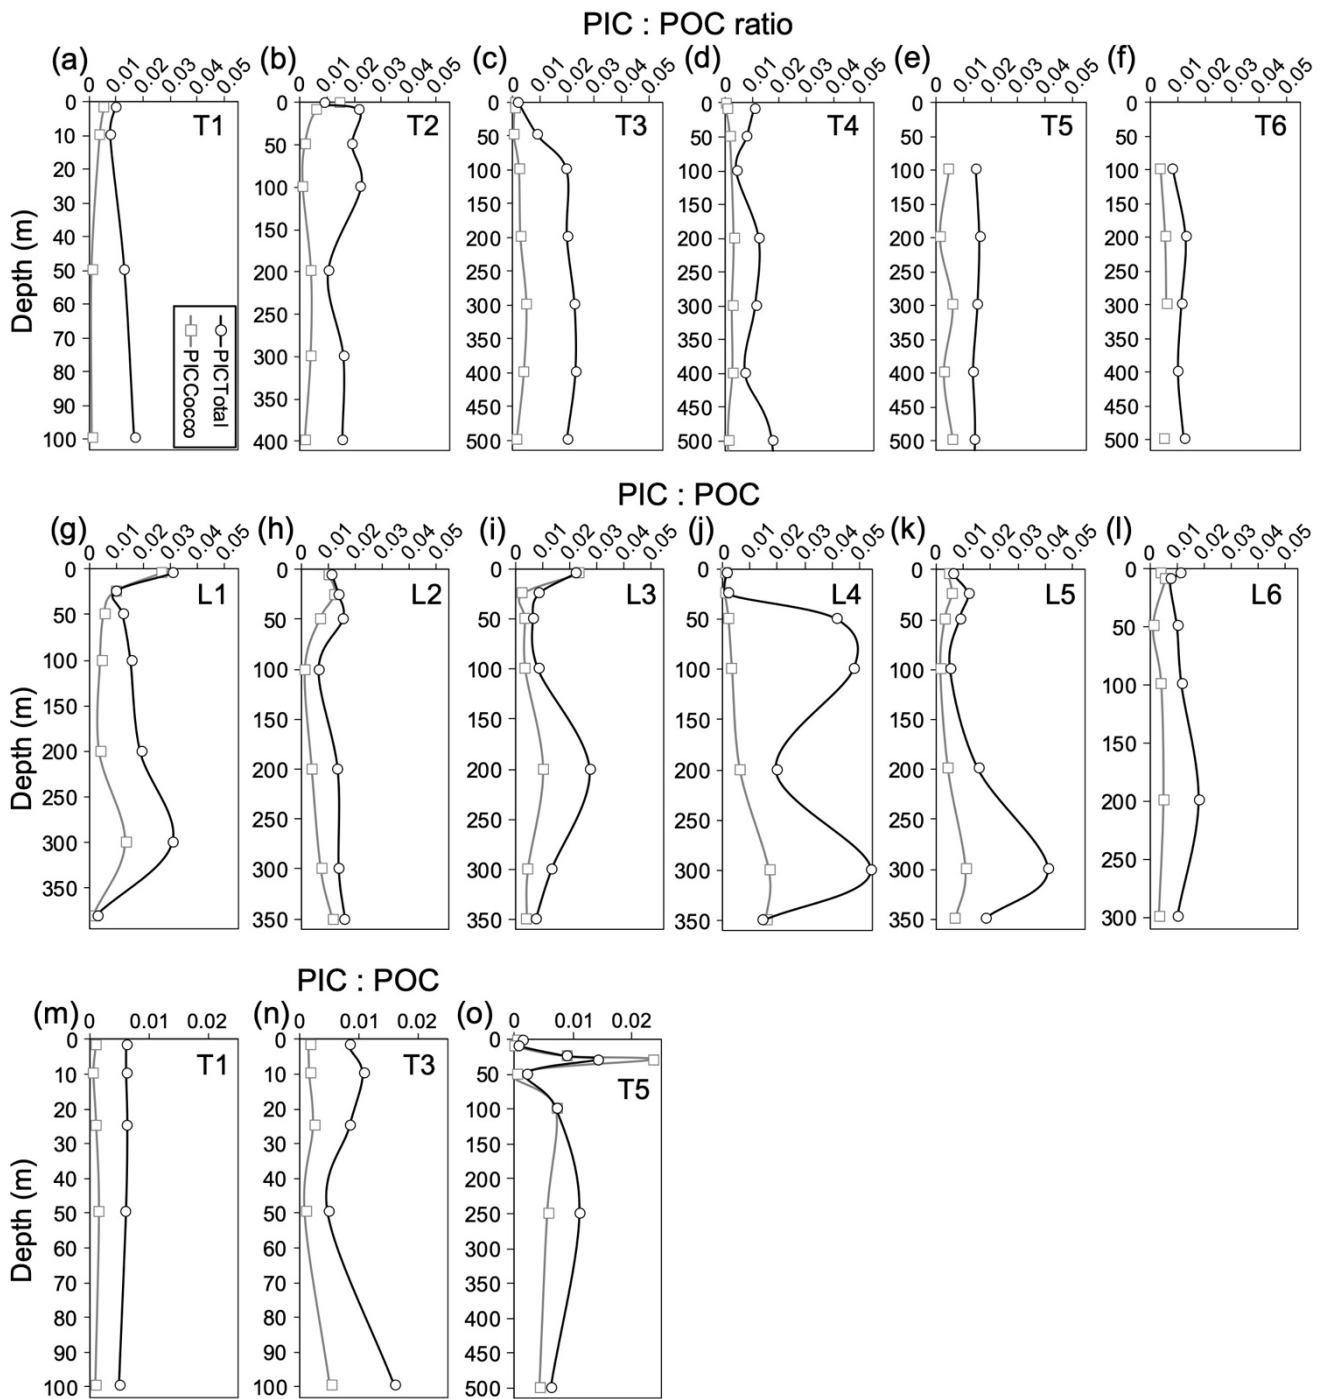

15

**Figure S2.** Profiles of PIC:POC ratios built with PIC<sub>Total</sub> and PIC<sub>Cocco</sub> data across the inshore-offshore (profiles a-f) and latitudinal legs (profiles g-l) sampled during late-spring 2015, as well across the inshore-offshore leg (profiles m-o) sampled during mid-summer 2018.



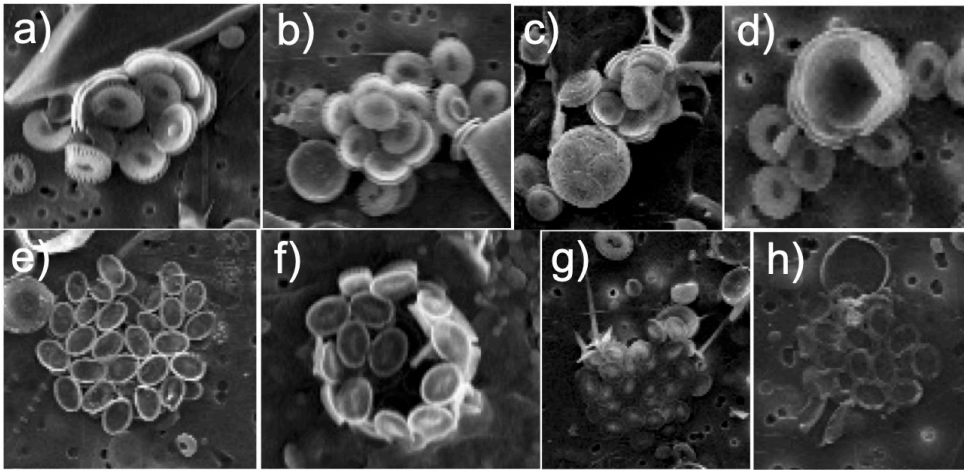

20 **Figure S3.** Zoom of scanning electron microscopy images showing layers of coccoliths detached from *G. huxleyi* (a-c), as well as, collapsed coccospheres with distinct brightness (d-h).

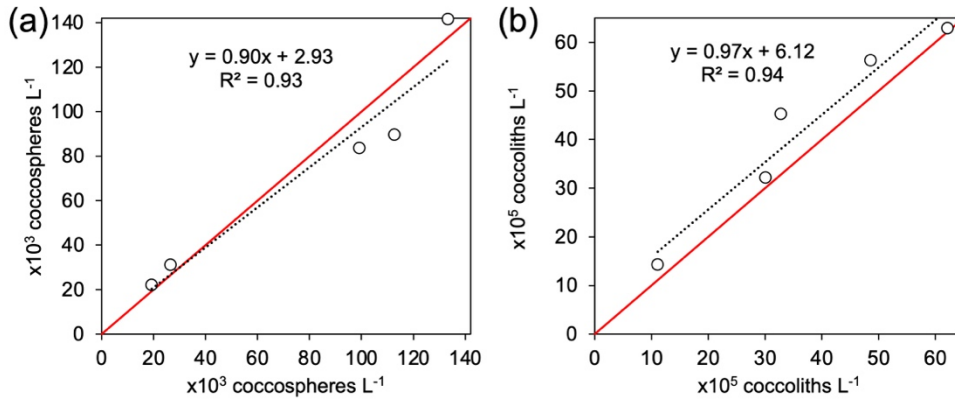

25 **Figure S4.** Linear relationship for coccospheres (a) and detached coccoliths counts (b) obtained through cross-polarized light microscopy and SEM examination methods. The red line indicates 1:1 ratio, whereas the dotted curve depicts the empirical trend.

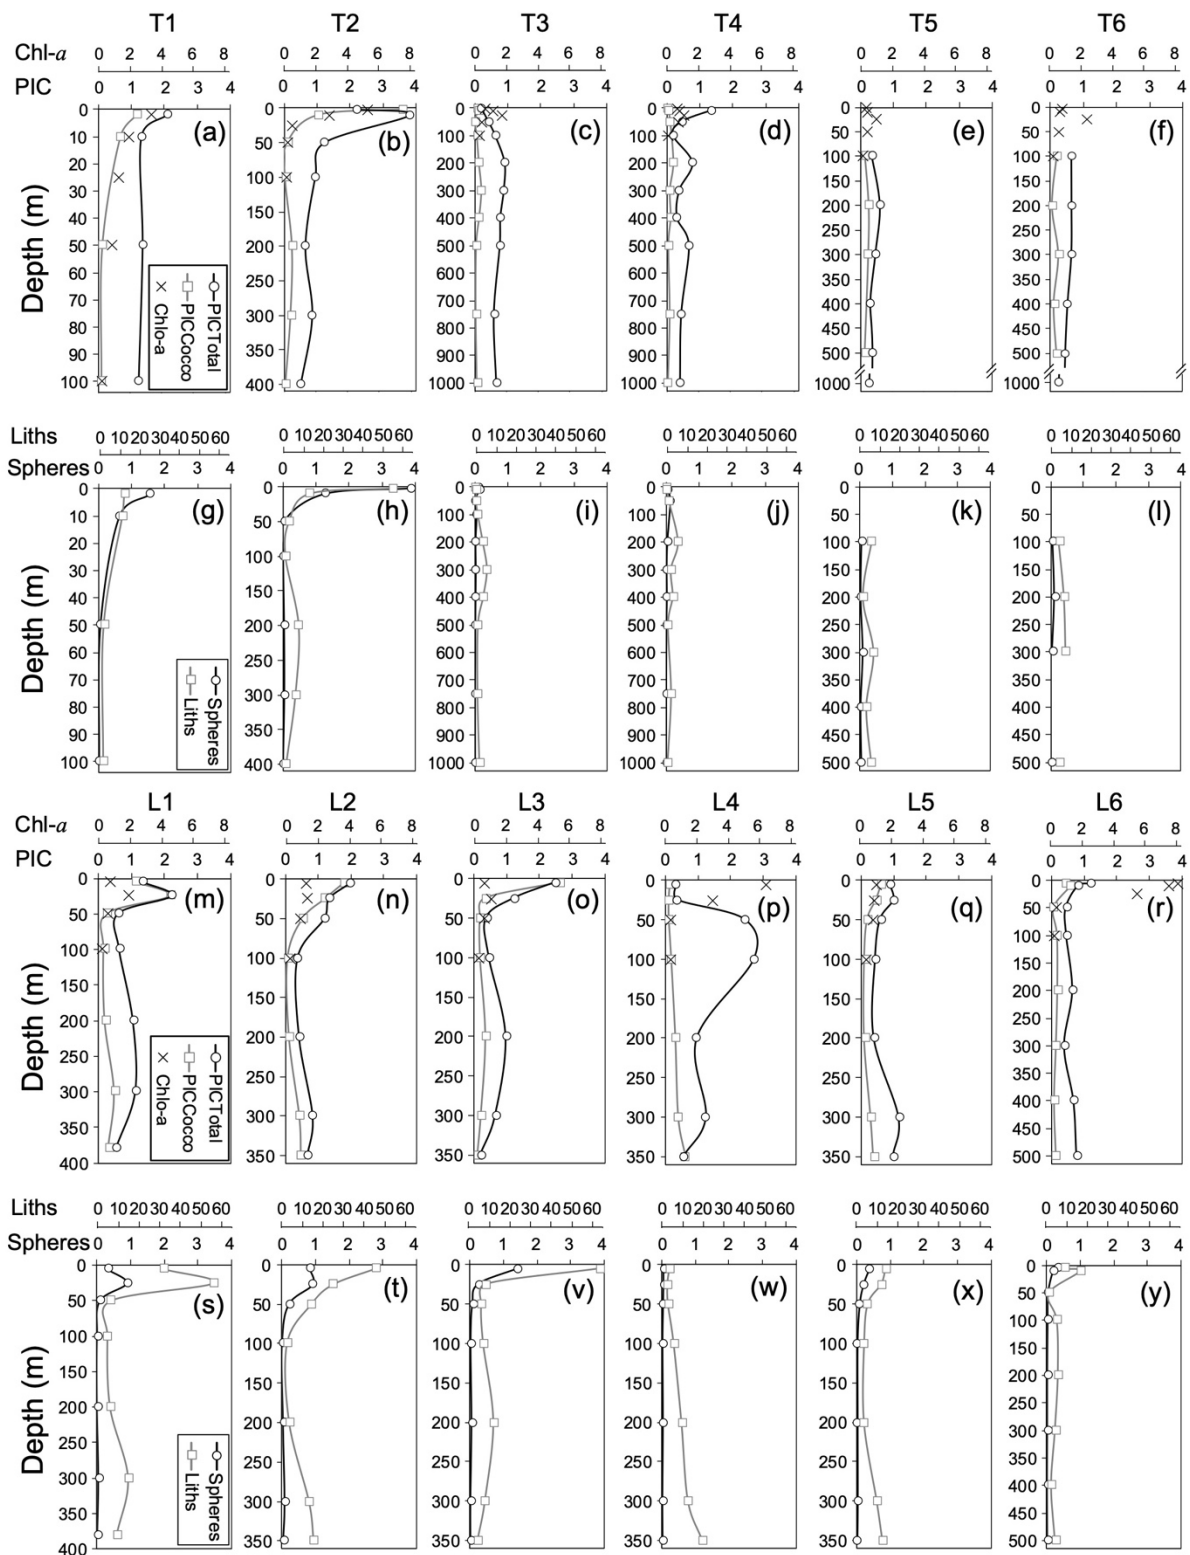

**Figure S5. PIC<sub>Total</sub>, PIC<sub>Cocco</sub>, Chl-a, coccospheres, and detached-coccolith profiles across the inshore-offshore (profiles a-l) and latitudinal legs (profiles m-y) sampled during the late-spring 2015. Note each variables axes span the same range.**

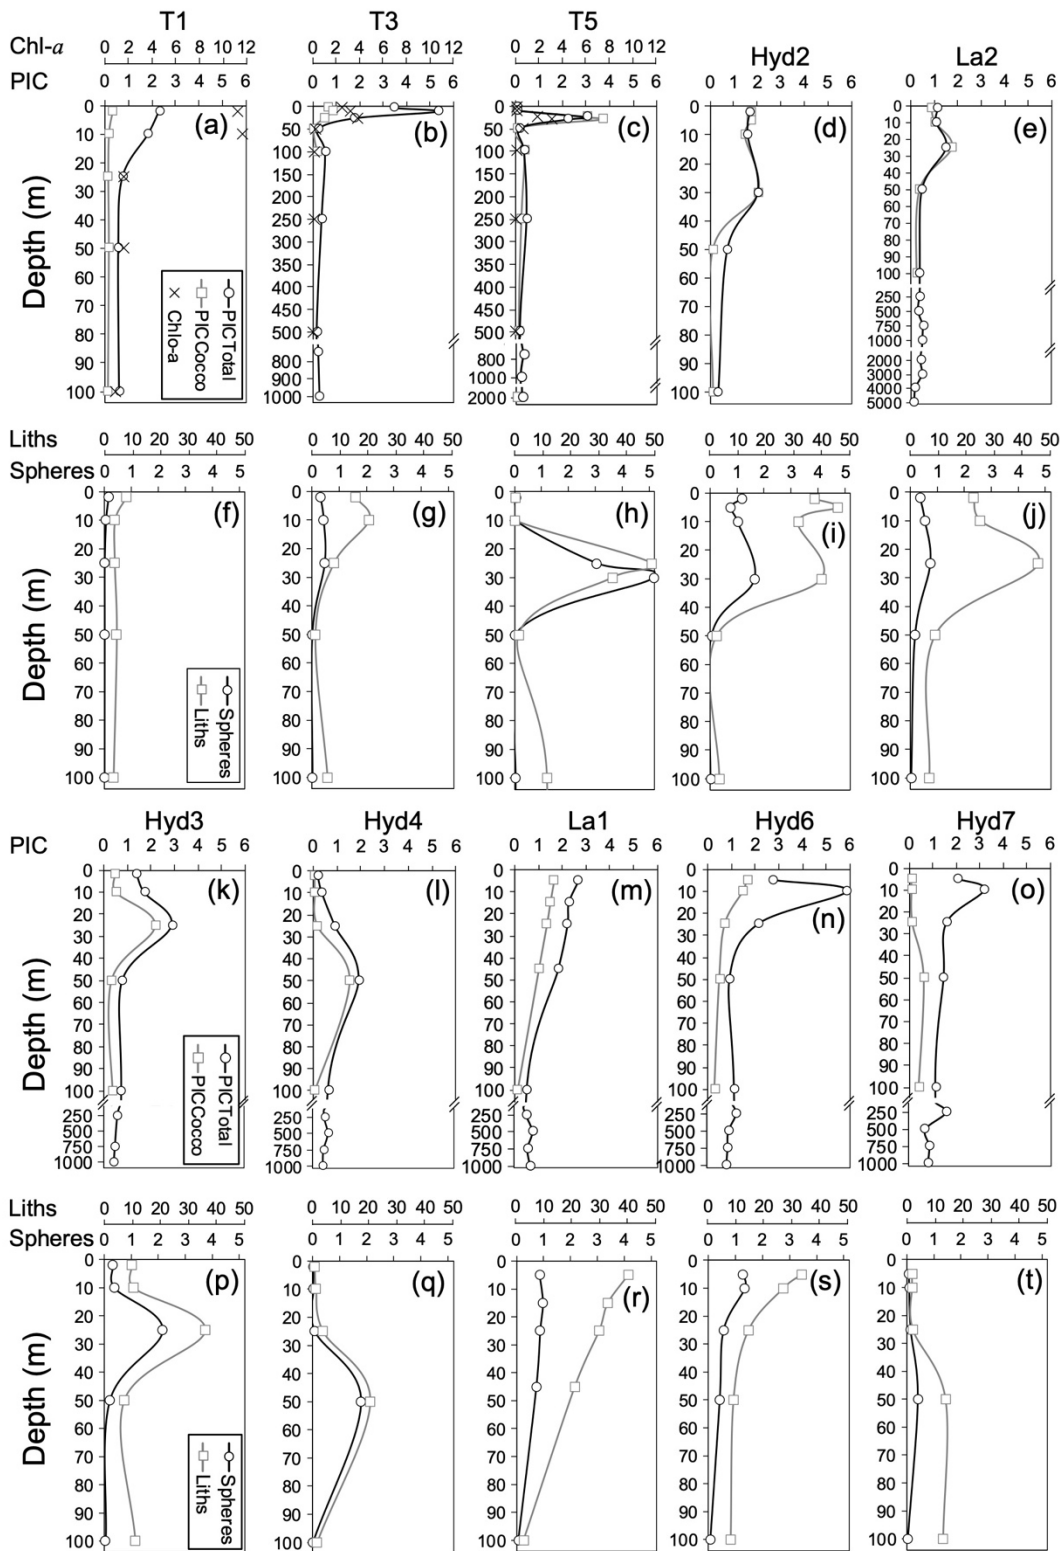

30 **Figure S6.**  $\text{PIC}_{\text{Total}}$ ,  $\text{PIC}_{\text{Coccos}}$ , Chl-a, coccospheres, and detached-coccolith profiles across the inshore-offshore (profiles a-c and f-h) and latitudinal legs (profiles d-e and i-t) sampled during the mid-summer 2018. Note each variables axes span the same range.

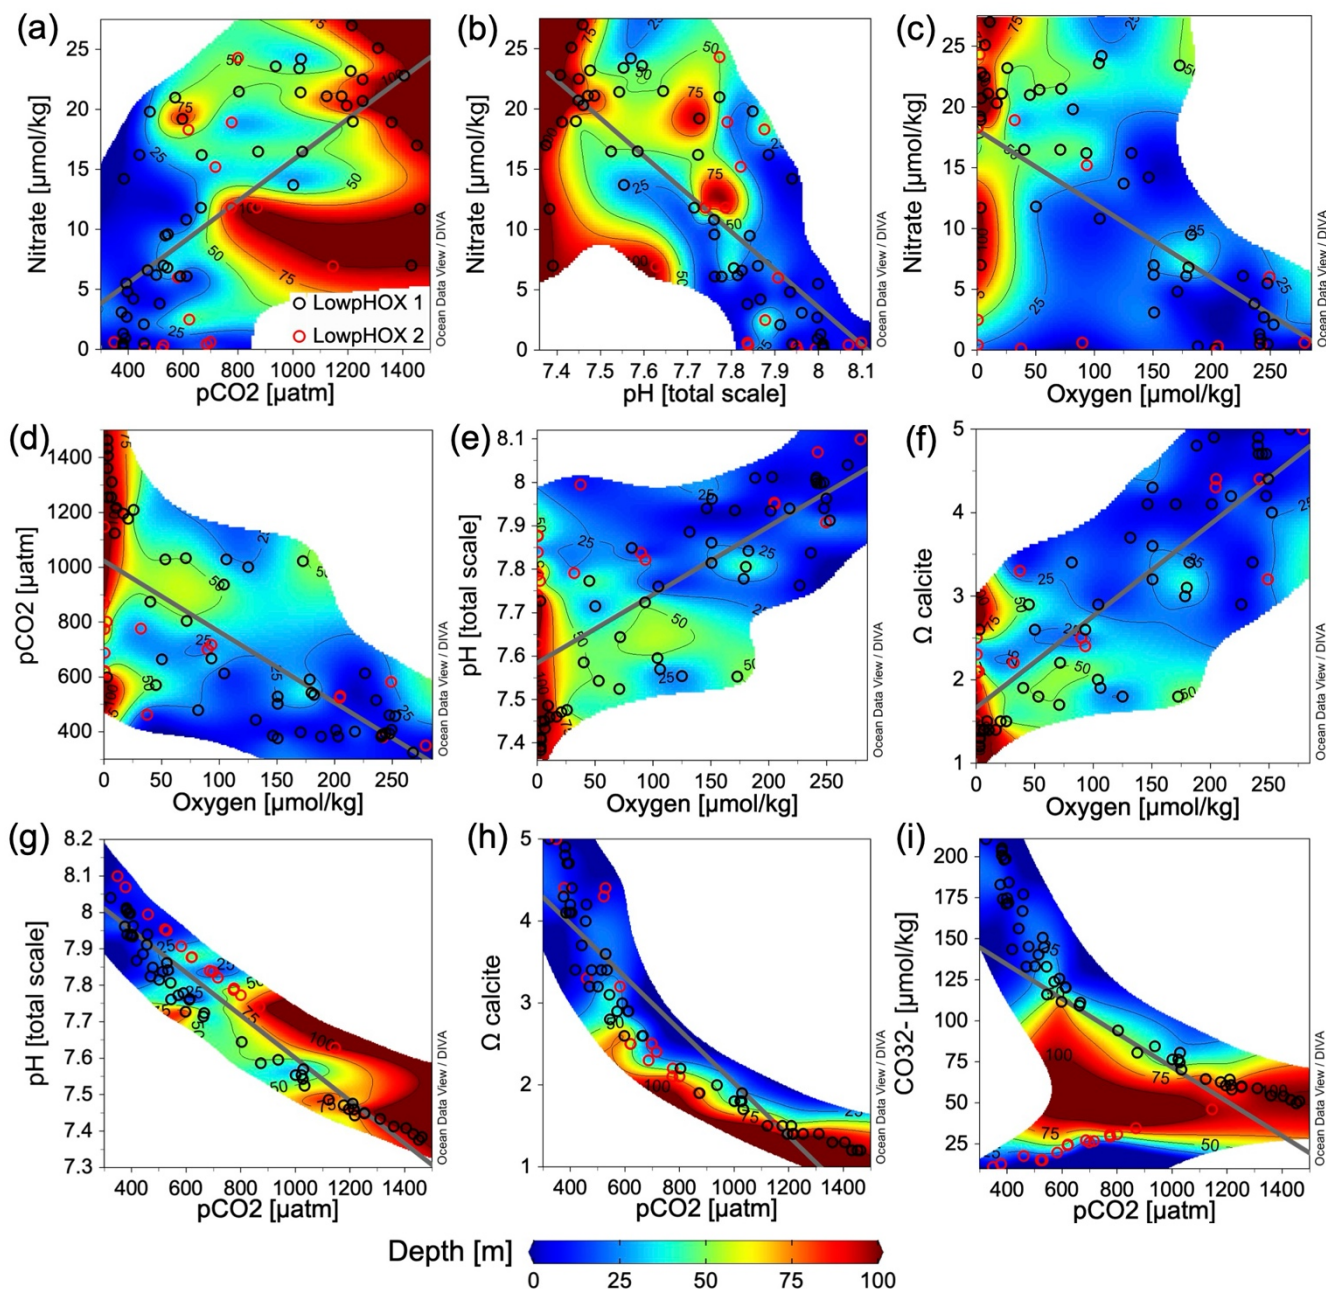

35 **Figure S7.** Variation in nitrate vs  $\text{pCO}_2$  (a), pH (b) and oxygen (c), along with variation in oxygen vs  $\text{pCO}_2$  (d), pH (e), and  $\Omega$  calcite (f), plus  $\text{pCO}_2$  vs pH (g),  $\Omega$  calcite (h), and carbonate ion (i) recorded within 100-m depth during late-spring 2015 (open black dots) and mid-summer 2018 (open red dots). Gray line depicts the least-square model fit curve.

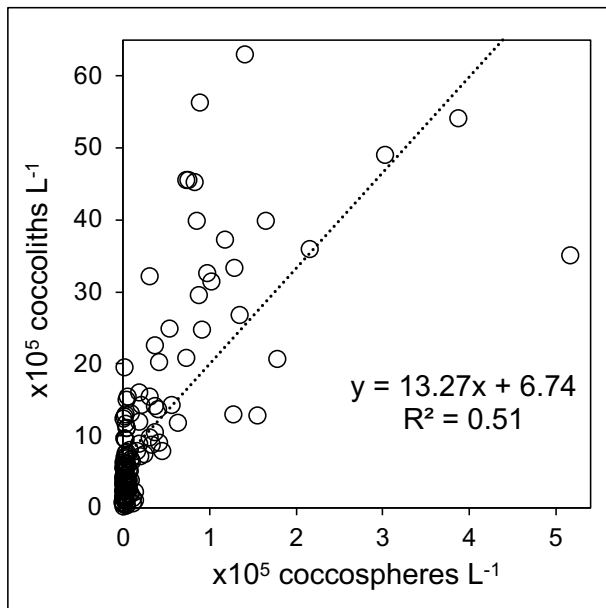

Figure S8. Linear relationship between coccospheres vs detached coccoliths recorded during late-spring 2015 and mid-summer 2018.

40

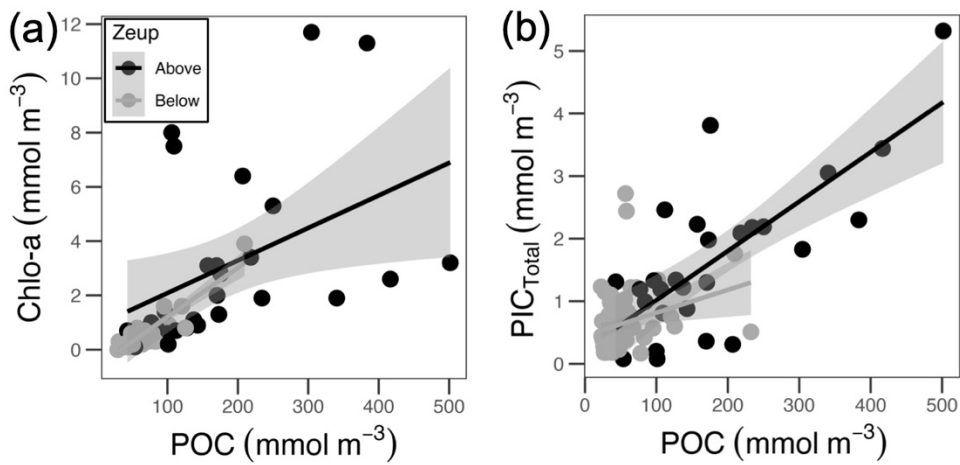

Figure S9. Chl-*a* versus POC and PIC<sub>Total</sub> versus POC data variation.

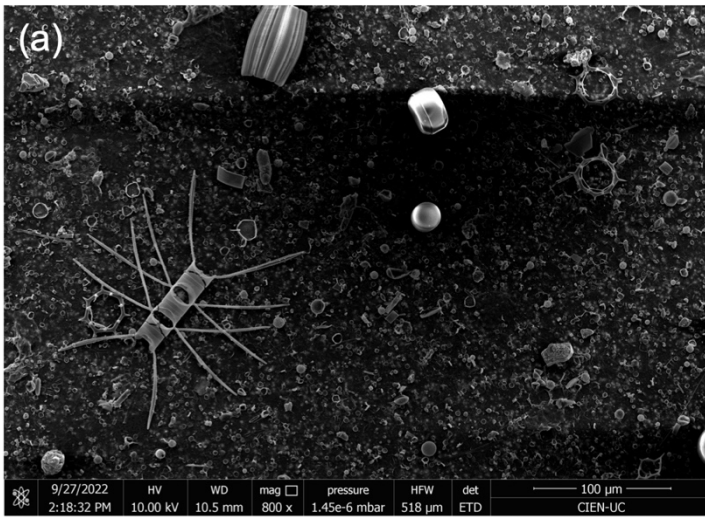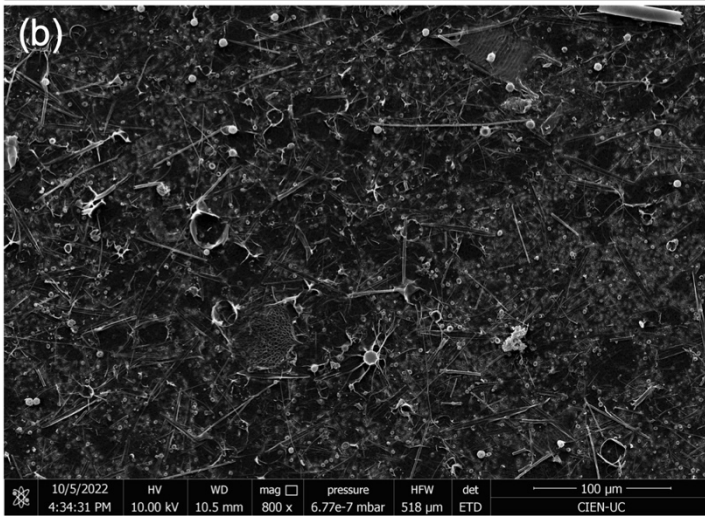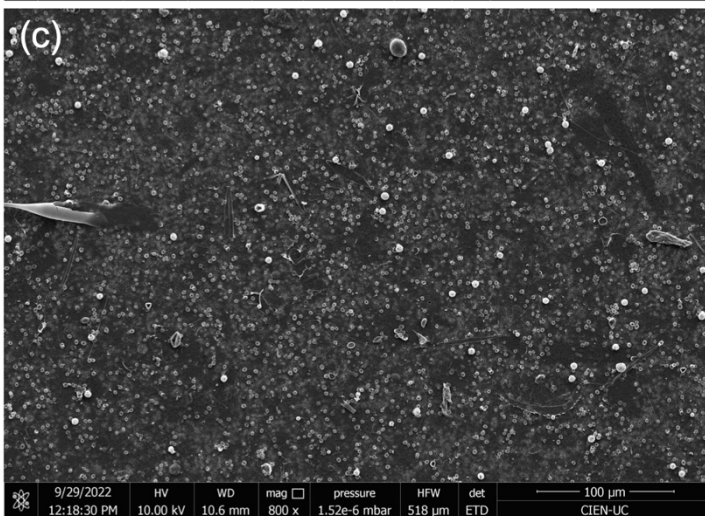

**Figure S10. Scanning electron microscopy showing diverse coccolithophore and diatom assemblages in 2015 station T1 at 2 m depth (a) as well the dominance of coccospheres and detached-coccoliths of *G. huxleyi* during post-bloom of diatoms in 2015 station L2 at 5 m depth (b) and under low biomass conditions in 2015 station L3 at 5 m depth (c). Each 800x frame corresponds to 0.2 mm<sup>2</sup>.**



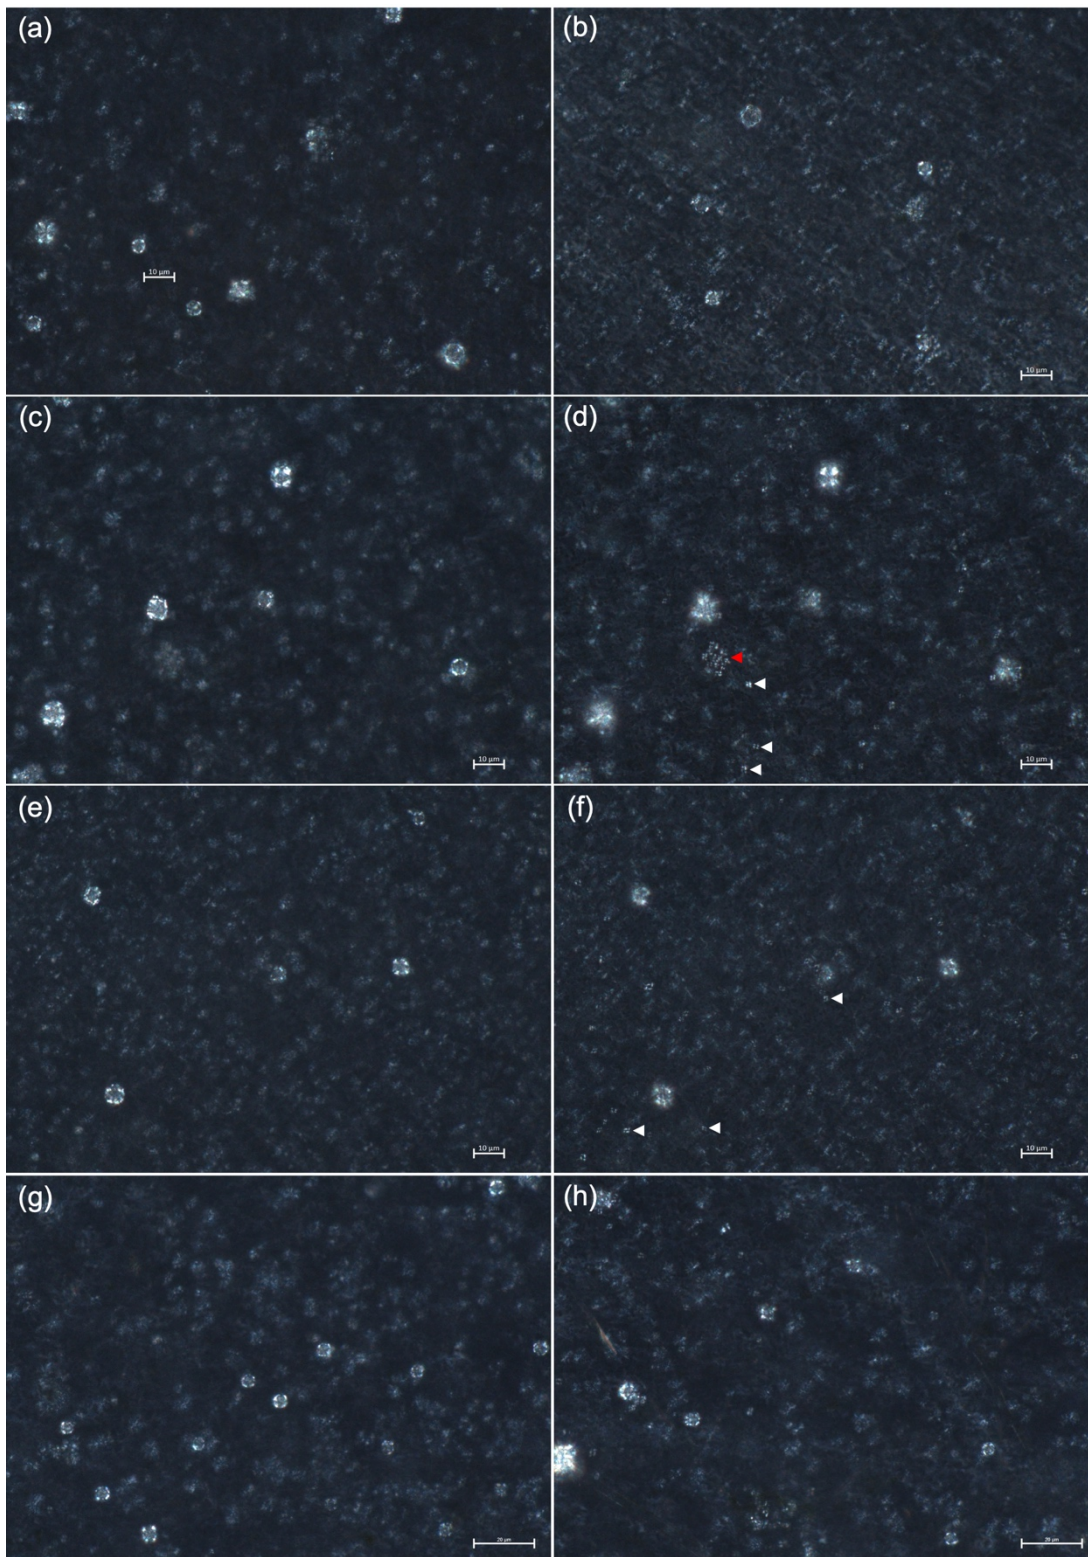

50 **Figure S11. Cross-polarized light microscopy showing coccospheres and detached coccoliths of *G. huxleyi* dominating during mid-summer 2018. Images corresponding to: (a) Station Hyd3 at 25 m depth, (b) Station Hyd4 at 50 m depth, (c and d) Station Hyd6 at 10 m depth different focus, (e and f) Station Lander1 (La1) at 15 m depth with distinct focus, (g) Station T5 at 30 m depth, and (h) Station T5 at 30 m depth. Note the white arrows in (d) and (f) indicate some detached coccoliths, and red arrow in (d) a layer of coccoliths included in detached-coccoliths counts. All images taken at 630x magnification.**

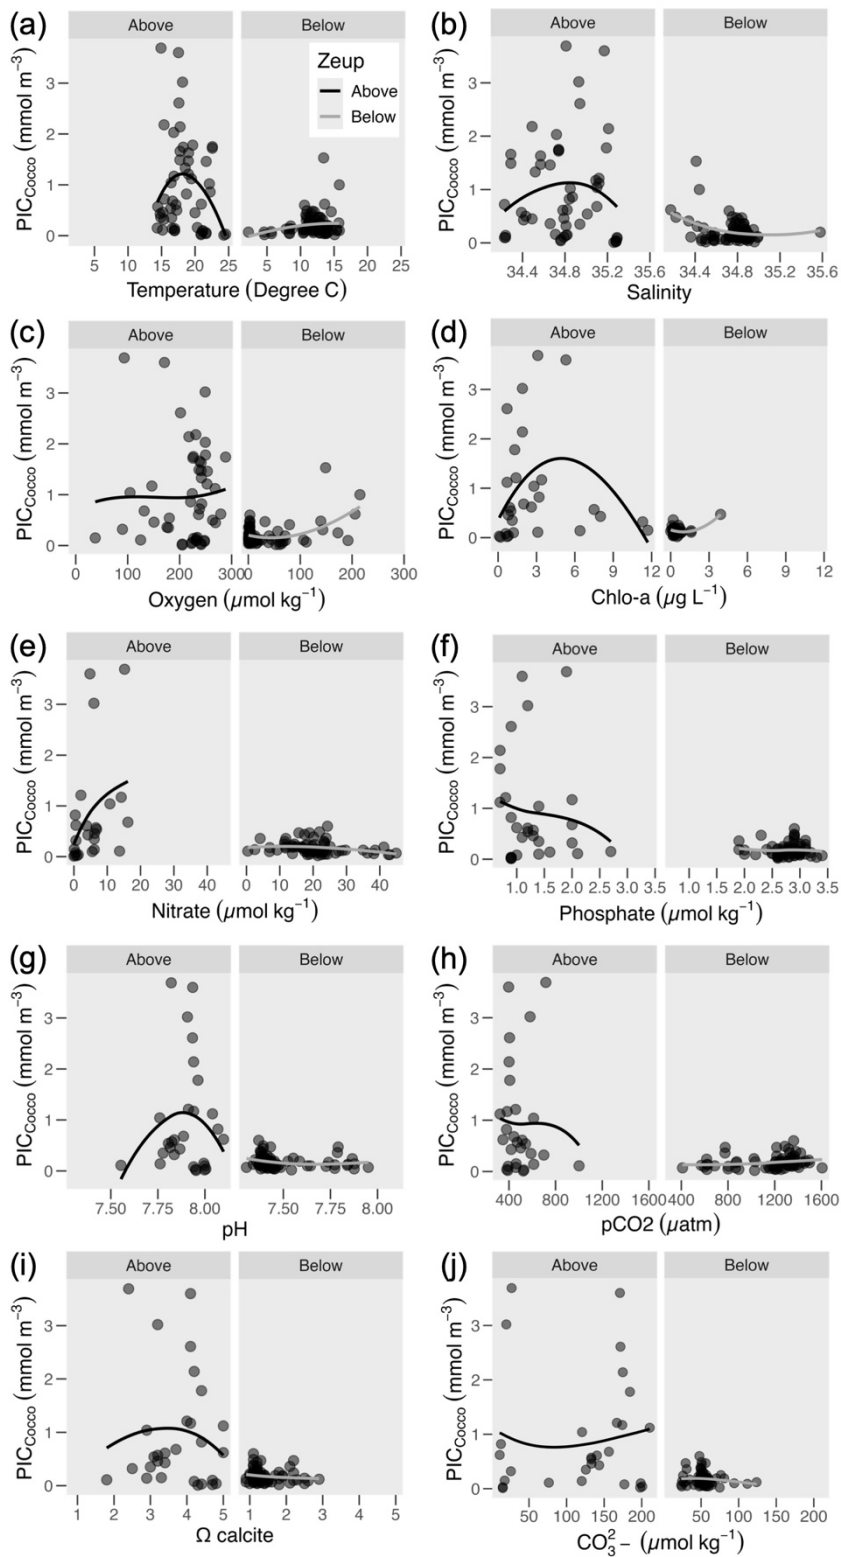

**Figure S12. Above and below euphotic depth variation in  $\text{PIC}_{\text{Cocco}}$  across environmental conditions during late-spring 2015 and mid-summer 2018. Temperature (a), Salinity (b), oxygen (c), Chl-*a* (d), nitrate (e), phosphate (f), pH (g),  $p\text{CO}_2$  (h),  $\Omega$  calcite (i), and carbonate ion (j) are shown.**

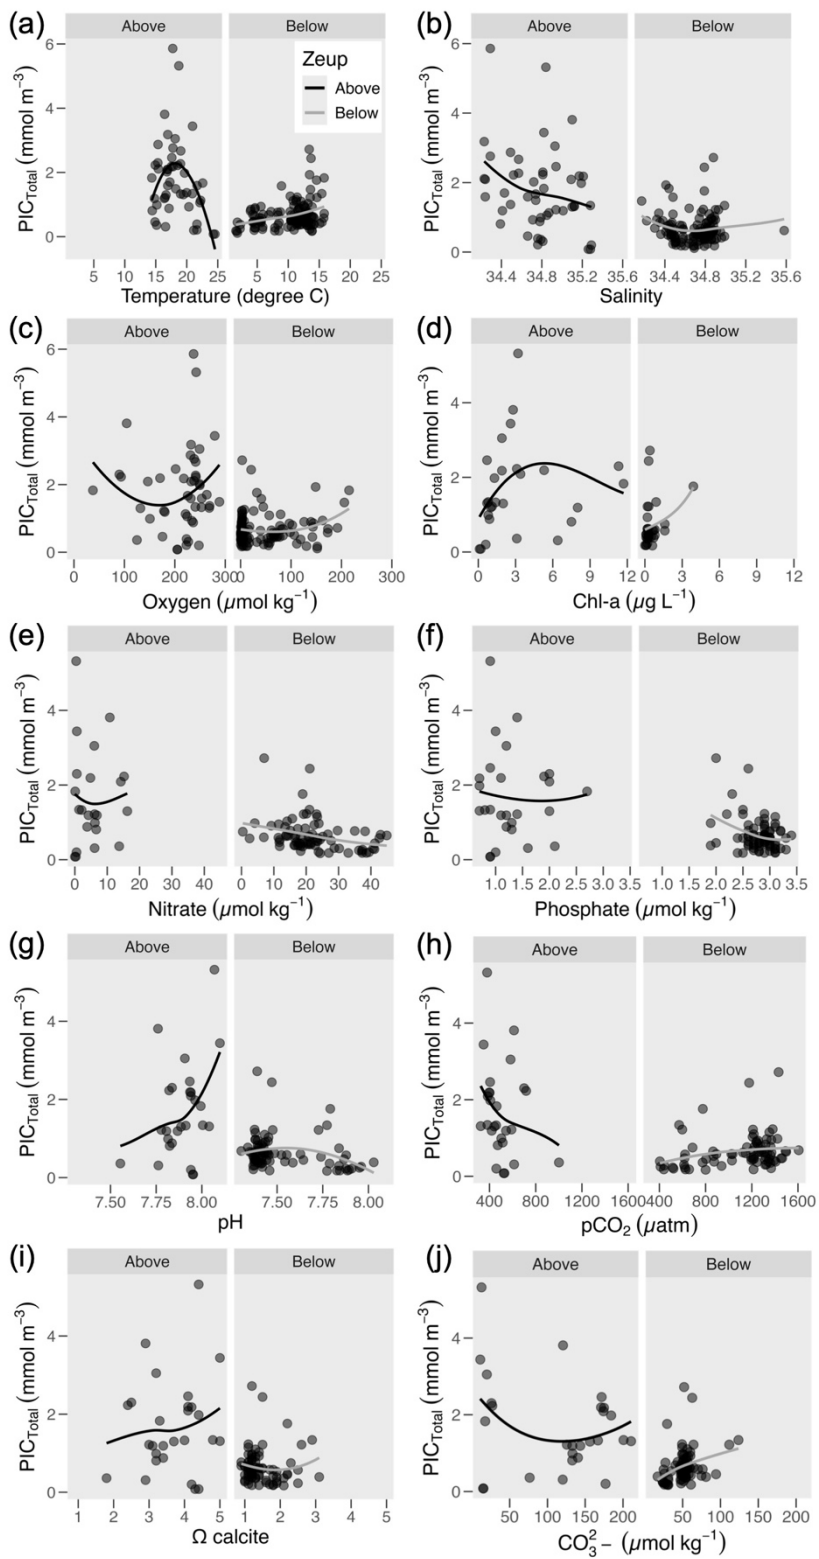

60 **Figure S13.** Above and below euphotic depth variation in  $PIC_{Total}$  across environmental conditions during late-spring 2015 and mid-summer 2018. Temperature (a), Salinity (b), oxygen (c), Chl-*a* (d), nitrate (e), phosphate (f), pH (g),  $pCO_2$  (h),  $\Omega$  calcite (i), and carbonate ion (j) are shown.

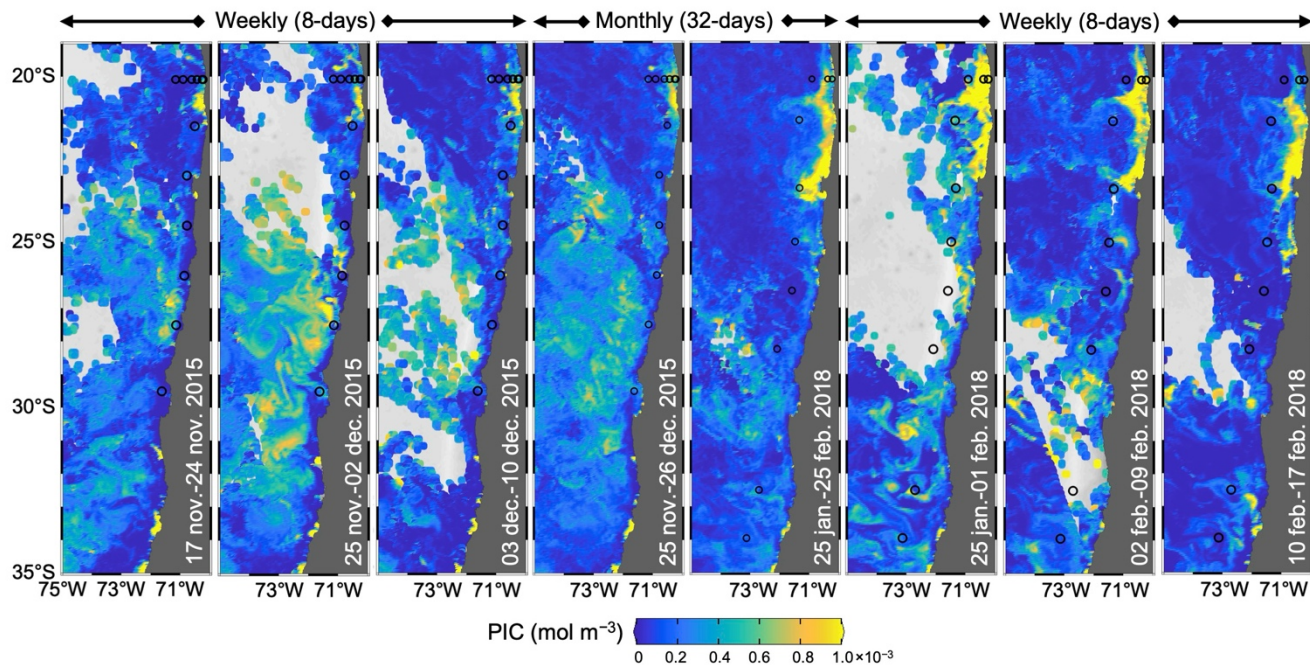

65

**Figure S14.** Weekly and monthly satellite-PIC climatologies during the LowpHOX 1 (27-28 nov./05-09 dec. 2015; open circles) and LowpHOX 2 sampling (30 ene./03-09 feb./12-13 feb. 2018; open circles).
